# Supplementary material for: Sulfonated metal organic framework loaded on iron oxide nanoparticles as a new sorbent for the magnetic solid phase extraction of cadmium from environmental water samples
Source: Royal Society of Chemistry journal article supplement (doi:10.1039/c6ay01692h), 2016-01-01
Supplement: c6ay01692h1.pdf [file c6ay01692h1.pdf]

**Sulfonated metal organic framework loaded on iron oxide nanoparticles as a new sorbent for the magnetic solid phase extraction of cadmium from environmental water samples**

Seyed Ershad Moradi,<sup>a</sup> Ali Mohammad Haji Shabani,<sup>a</sup> Shayessteh Dadfarnia,<sup>\*a</sup> Saeed Emami<sup>b</sup>

<sup>a</sup>*Department of Chemistry, Faculty of Science, Yazd University, Yazd 89195-741, Iran*

<sup>b</sup>*Department of Medicinal Chemistry and Pharmaceutical Sciences Research Center, Faculty of Pharmacy, Mazandaran University of Medical Sciences, Sari, Iran*

---

\* Corresponding author.

*E-mail: [sdadfarnia@yazd.ac.ir](mailto:sdadfarnia@yazd.ac.ir); Tel.: +983531232667; Fax: +98 353 8210644*

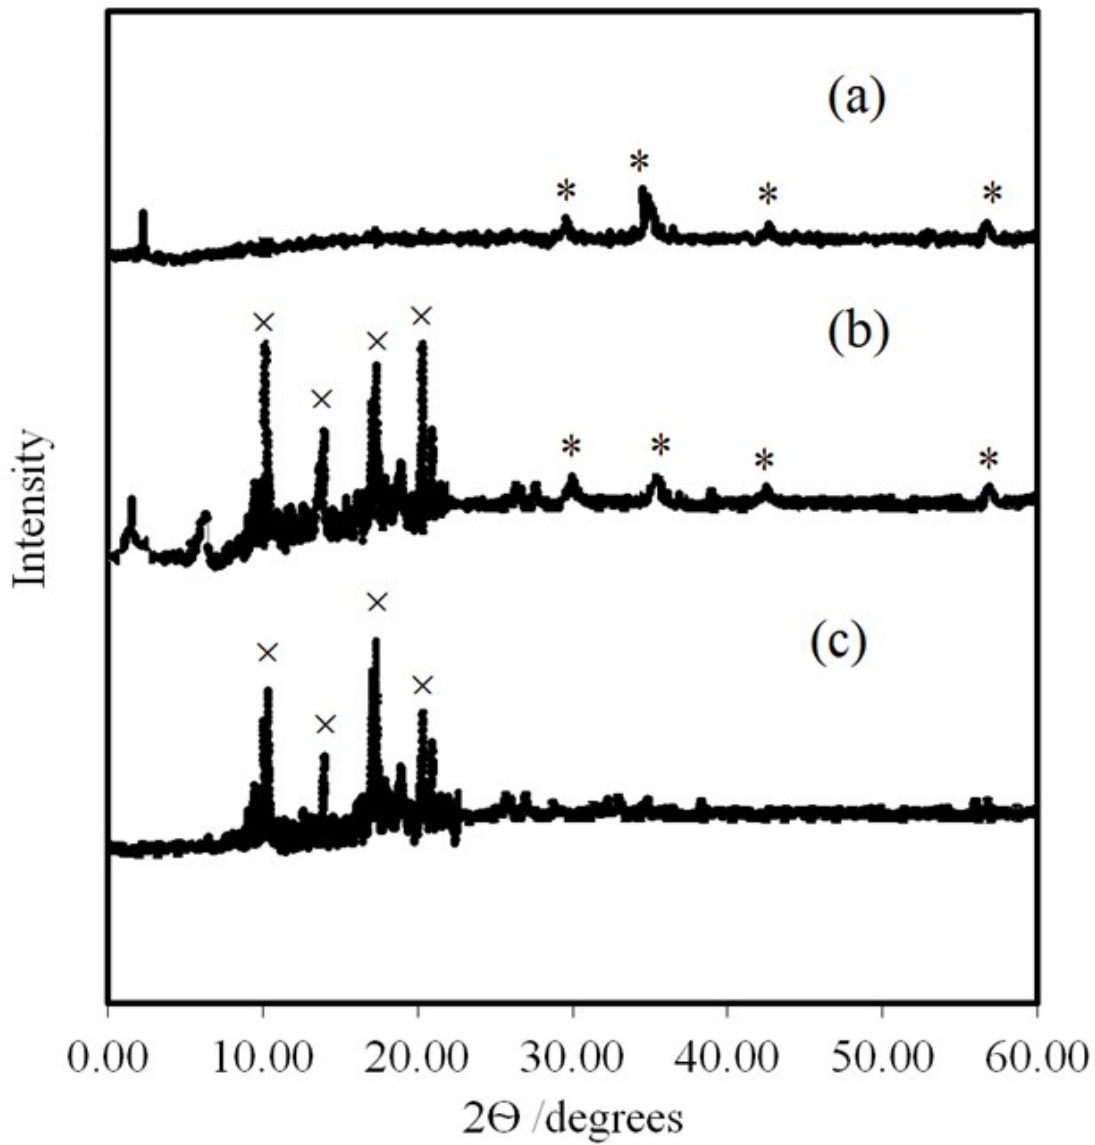

**Fig. S1** XRD pattern of (a)  $\text{Fe}_3\text{O}_4$ , (b)  $\text{Fe}_3\text{O}_4@MOF-235(Fe)-OSO_3H$ , and (c) MOF-235(Fe) samples. \* stands for  $\text{Fe}_3\text{O}_4$  and  $\times$  stands for MOF-235(Fe) samples.

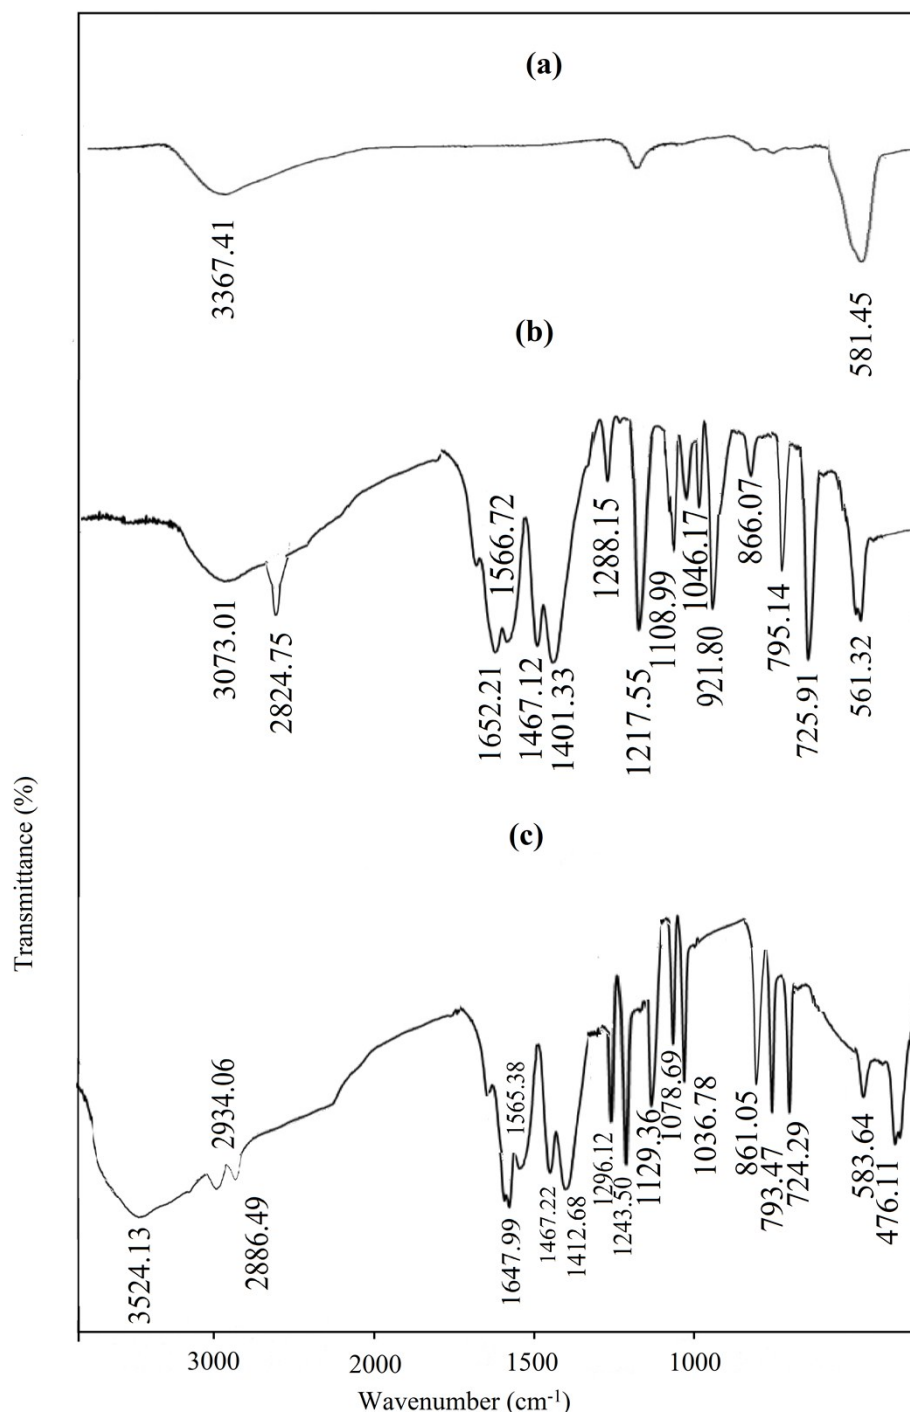

**Fig. S2** FT-IR spectra of (a)  $\text{Fe}_3\text{O}_4$ , (b)  $\text{Fe}_3\text{O}_4@MOF-235(Fe)$ , and (c)  $\text{Fe}_3\text{O}_4@MOF-235(Fe)-OSO_3H$  samples.

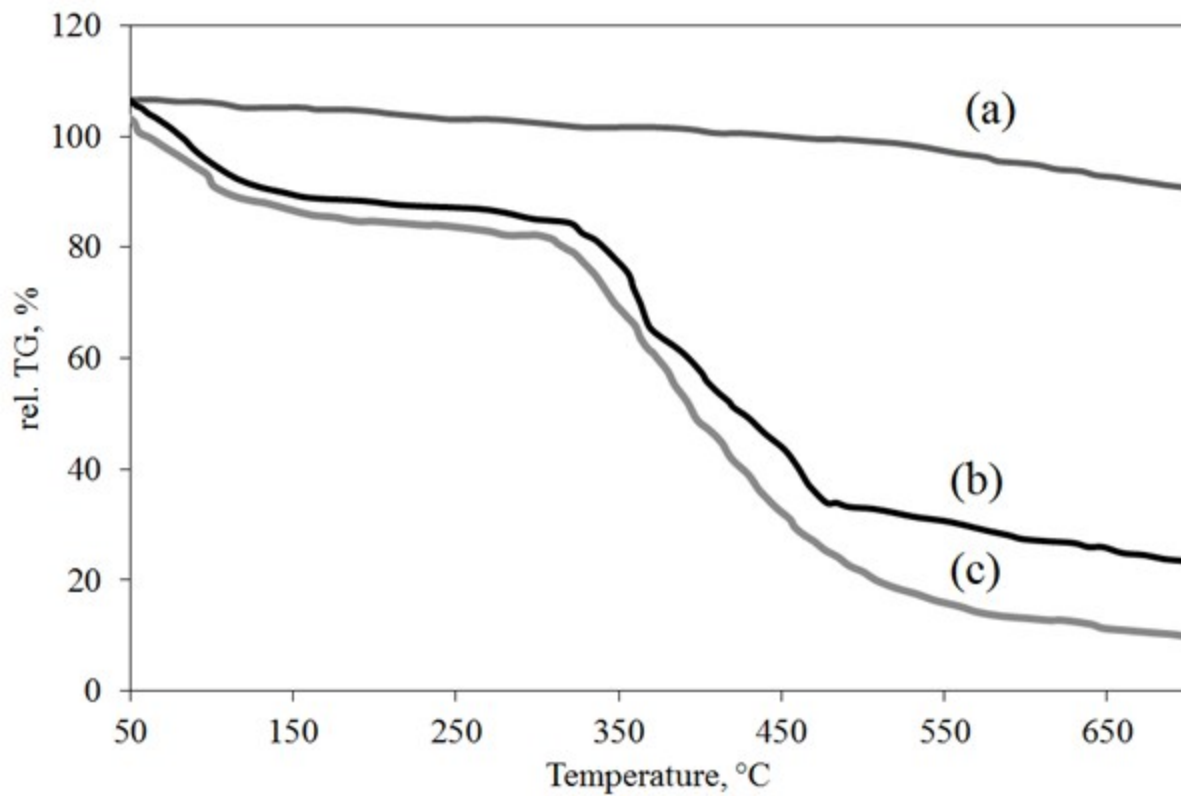

**Fig. S3** TGA analysis of (a) Fe<sub>3</sub>O<sub>4</sub>, (b) MOF-235(Fe) and (c) Fe<sub>3</sub>O<sub>4</sub>@MOF-235(Fe)-OSO<sub>3</sub>H.
